# Supplementary material for: Assessment Practice of Patient-Centered Outcomes in Surgical Neuro-Oncology: Survey-Based Recommendations for Clinical Routine
Source: Frontiers journal article supplement (doi:10.3389/fonc.2021.702017), 2021-08-11
Supplement: Data_Sheet_1.PDF [file Data_Sheet_1.PDF]

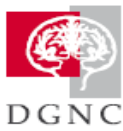

## Survey from the Neuro-Oncology Section of the DGNC

### 1. Clinical Structure:

Federal state: \_\_\_\_\_

- |                                            |                                                   |
|--------------------------------------------|---------------------------------------------------|
| <input type="checkbox"/> University Clinic | <input type="checkbox"/> Neurosurgical Department |
| <input type="checkbox"/> Teaching Hospital | <input type="checkbox"/> Neurological Department  |
| <input type="checkbox"/> Hospital          | <input type="checkbox"/> Radiotherapy Department  |

Is a specialized neuro-oncological outpatient ambulance available?

- ☐ yes      ☐ no

Brain tumor surgeries/year

Awake surgeries

- |                               |                                        |
|-------------------------------|----------------------------------------|
| <input type="checkbox"/> <100 | <input type="checkbox"/> rather seldom |
| <input type="checkbox"/> >100 | <input type="checkbox"/> regularly     |
| <input type="checkbox"/> >200 |                                        |
| <input type="checkbox"/> >300 |                                        |

Neuro-oncologic consultations or outpatient cases  
of brain tumors/year (approx.): \_\_\_\_\_

For radiotherapists:

Initial radiation treatments (of brain tumors) per year (approx.): \_\_\_\_\_

Neuro-oncology center certified according to DKG criteria?

- ☐ yes      ☐ no

Psycho-oncologist available?

- ☐ yes      ☐ no      if yes: \_\_\_\_\_ hrs/week

If yes: ☐ in own clinic      ☐ in cooperation

Main profession of the psycho-oncologist?

- ☐ physician  
☐ psychologist  
☐ social worker  
☐ healthcare chaplain  
☐ other: \_\_\_\_\_  
☐ not sure / unknown

What is the organizational structure of psycho-oncology?

- ☐ inpatient                      ☐ outpatient                      ☐ both  
☐ on-site                              ☐ consultation service  
☐ just once                      ☐ longer-term therapy

If longer-term therapy: specific interventions? \_\_\_\_\_

Palliative care available?

- ☐ outpatient                      ☐ inpatient                      ☐ both

If yes:                      ☐ in own clinic                      ☐ in cooperation

In your estimate, how many weeks/months after the initial diagnosis of GBM does the first contact with palliative care occur on average?

Weeks/months \_\_\_\_\_

Neuropsychologist available?

- ☐ yes                      ☐ no                      if yes: \_\_\_\_\_ hrs/week

If yes:                      ☐ in own clinic                      ☐ in cooperation

## 2. Assessment of health related quality of life in brain tumor patients:

On regularly base                      ☐ yes                      ☐ no

- If yes :
- ☐ only in the context of clinical studies
  - ☐ only for certain diagnoses \_\_\_\_\_
  - ☐ estimated in \_\_\_\_\_ % of patients
  - ☐ inpatient only/ ☐ outpatient only / ☐ both

Is assessed by:

- ☐ nursing staff
- ☐ medical staff
- ☐ students
- ☐ study nurse
- ☐ case manager
- ☐ social worker
- ☐ psycho-oncologist

Which questionnaire:

- ☐ EORTC-C30      ☐ + BN20
- ☐ SF-36
- ☐ SF-12
- ☐ other: \_\_\_\_\_

### 3. Assessment of distress

On regularly base      ☐ yes      ☐ no

If yes :      ☐ only in the context of clinical studies

☐ only for certain diagnoses: \_\_\_\_\_

☐ estimated in \_\_\_\_\_ % patients

☐ inpatient only/ ☐ outpatient only / ☐ both

Is assessed in:

- ☐ patients
- ☐ caregivers

Is assessed by:

- ☐ nursing staff
- ☐ medical staff
- ☐ students
- ☐ study nurse
- ☐ case manager
- ☐ social worker
- ☐ psycho-oncologist

Which questionnaire?

- ☐ Distress Thermometer
- ☐ HADS
- ☐ PO-Bado
- ☐ BDI (Beck's Depression Inventory)
- ☐ other: \_\_\_\_\_

#### 4. Assessment of neurocognition

On regularly base ☐ yes ☐ no

If yes : ☐ only in the context of clinical studies

☐ only for certain diagnoses: \_\_\_\_\_

☐ estimated in \_\_\_\_\_ % patients

☐ inpatient only/ ☐ outpatient only / ☐ both

|                        |                          |     |                          |    |
|------------------------|--------------------------|-----|--------------------------|----|
| preoperative           | <input type="checkbox"/> | yes | <input type="checkbox"/> | no |
| postoperative          | <input type="checkbox"/> | yes | <input type="checkbox"/> | no |
| intraoperative         | <input type="checkbox"/> | yes | <input type="checkbox"/> | no |
| follow-up              | <input type="checkbox"/> | yes | <input type="checkbox"/> | no |
| standardized protocol? | <input type="checkbox"/> | yes | <input type="checkbox"/> | no |
| NOA-19 protocol        | <input type="checkbox"/> | yes | <input type="checkbox"/> | no |

Which Screening:

☐ MMST ☐ MoCA

☐ other: \_\_\_\_\_

Is assessed by:

- ☐ nursing staff
- ☐ medical staff
- ☐ students
- ☐ study nurse
- ☐ case manager
- ☐ social worker
- ☐ psycho-oncologist
